# Supplementary material for: Clinical Characterization of Targetable Mutations (BRAF V600E and KRAS G12C) in Advanced Colorectal Cancer—A Nation-Wide Study
Source: MDPI journal article supplement (doi:10.3390/ijms24109073), 2023-05-22
Supplement: s1 [file s1]

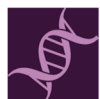

**Table S1.** Complete population characteristics.

1

| Parameter                    |         | Group               |                          |                      |                        |
|------------------------------|---------|---------------------|--------------------------|----------------------|------------------------|
|                              |         | Overall<br>(N=7604) | BRAF<br>V600E<br>(N=515) | KRAS G12C<br>(N=237) | other KRAS<br>(N=3591) |
| Sex                          | Female  | 3132 (41,19%)       | 295 (57,28%)             | 101 (42,62%)         | 1527 (42,52%)          |
|                              | Male    | 4471 (58,81%)       | 220 (42,72%)             | 136 (57,38%)         | 2064 (57,48%)          |
| Age [years]                  | < 30    | 21 (0,28%)          | 0 (0,00%)                | 0 (0,00%)            | 10 (0,28%)             |
|                              | 31-40   | 115 (1,51%)         | 6 (1,17%)                | 6 (2,53%)            | 49 (1,36%)             |
|                              | 41-50   | 432 (5,68%)         | 22 (4,27%)               | 13 (5,49%)           | 190 (5,29%)            |
|                              | 51-60   | 1298 (17,07%)       | 74 (14,37%)              | 36 (15,19%)          | 588 (16,37%)           |
|                              | 61-70   | 3192 (41,98%)       | 222 (43,11%)             | 111 (46,84%)         | 1486 (41,38%)          |
|                              | 71-80   | 2173 (28,58%)       | 156 (30,29%)             | 64 (27,00%)          | 1070 (29,80%)          |
|                              | over 80 | 373 (4,91%)         | 35 (6,80%)               | 7 (2,95%)            | 198 (5,51%)            |
| Tumour stage                 | T1      | 39 (0,98%)          | 0 (0,00%)                | 1 (0,83%)            | 25 (1,29%)             |
|                              | T2      | 291 (7,29%)         | 10 (3,33%)               | 11 (9,09%)           | 144 (7,44%)            |
|                              | T3      | 2611 (65,37%)       | 175 (58,33%)             | 81 (66,94%)          | 1243 (64,20%)          |
|                              | T4      | 1039 (26,01%)       | 115 (38,33%)             | 28 (23,14%)          | 516 (26,65%)           |
|                              | Tis     | 14 (0,35%)          | 0 (0,00%)                | 0 (0,00%)            | 8 (0,41%)              |
| Nodal stage                  | N0      | 1006 (25,42%)       | 57 (19,32%)              | 37 (30,33%)          | 486 (25,34%)           |
|                              | N1a     | 516 (13,04%)        | 40 (13,56%)              | 8 (6,56%)            | 272 (14,18%)           |
|                              | N1b     | 735 (18,57%)        | 43 (14,58%)              | 27 (22,13%)          | 354 (18,46%)           |
|                              | N1c     | 209 (5,28%)         | 11 (3,73%)               | 8 (6,56%)            | 114 (5,94%)            |
|                              | N2a     | 649 (16,4%)         | 55 (18,64%)              | 26 (21,31%)          | 307 (16,01%)           |
|                              | N2b     | 728 (18,39%)        | 82 (27,80%)              | 13 (10,66%)          | 336 (17,52%)           |
|                              | Nx      | 115 (2,91%)         | 7 (2,37%)                | 3 (2,46%)            | 49 (2,55%)             |
| Nodal stage<br>(0 vs 1 vs 2) | N0      | 1006 (26,18%)       | 57 (19,79%)              | 37 (31,09%)          | 486 (26,00%)           |
|                              | N1      | 1460 (37,99%)       | 94 (32,64%)              | 43 (36,13%)          | 740 (39,59%)           |
|                              | N2      | 1377 (35,83%)       | 137 (47,57%)             | 39 (32,77%)          | 643 (34,40%)           |

|                                          |                           |               |              |               |               |
|------------------------------------------|---------------------------|---------------|--------------|---------------|---------------|
| Nodal stage<br>(positive vs<br>negative) | Negative                  | 1006 (26,18%) | 57 (19,79%)  | 37 (31,09%)   | 486 (26,00%)  |
|                                          | Positive                  | 2837 (73,82%) | 231 (80,21%) | 82 (68,91%)   | 1383 (74,00%) |
| Histology                                | Adenocarcinoma<br>NOS     | 6364 (89,93%) | 362 (78,02%) | 196 (88,69%)  | 3108 (88,52%) |
|                                          | Partially<br>mucinous     | 632 (8,93%)   | 89 (58,17%)  | 23 (56,10%)   | 382 (56,26%)  |
|                                          | Mucinous                  | 35 (0,49%)    | 6 (3,92%)    | 0 (0,00%)     | 10 (1,47%)    |
|                                          | Cribriiform or<br>comedo  | 32 (0,45%)    | 2 (1,31%)    | 2 (4,88%)     | 9 (1,33%)     |
|                                          | MANEC                     | 14 (0,2%)     | 5 (3,27%)    | 0 (0,00%)     | 2 (0,29%)     |
| Mucous<br>component                      | No                        | 6555 (86,2%)  | 385 (74,76%) | 200 (84,39%)  | 2975 (82,85%) |
|                                          | Yes                       | 1049 (13,8%)  | 130 (25,24%) | 37 (15,61%)   | 616 (17,15%)  |
| Signet cells<br>presence                 | No                        | 7187 (94,52%) | 474 (92,04%) | 223 (94,09%)  | 3357 (93,48%) |
|                                          | Yes                       | 417 (5,48%)   | 41 (7,96%)   | 14 (5,91%)    | 234 (6,52%)   |
| Lymphocytic<br>infiltration              | No                        | 7518 (98,87%) | 510 (99,03%) | 237 (100,00%) | 3549 (98,83%) |
|                                          | Yes                       | 86 (1,13%)    | 5 (0,97%)    | 0 (0,00%)     | 42 (1,17%)    |
| Grade                                    | G1                        | 590 (12,14%)  | 26 (7,60%)   | 17 (10,90%)   | 299 (12,88%)  |
|                                          | G2                        | 3509 (72,22%) | 181 (52,92%) | 122 (78,21%)  | 1708 (73,59%) |
|                                          | G3                        | 756 (15,56%)  | 134 (39,18%) | 17 (10,90%)   | 313 (13,49%)  |
|                                          | G4                        | 4 (0,08%)     | 1 (0,29%)    | 0 (0,00%)     | 1 (0,04%)     |
| Grade<br>(1-2 vs 3-4)                    | G1-2                      | 4099 (84,36%) | 207 (60,53%) | 139 (89,10%)  | 2007 (86,47%) |
|                                          | G3-4                      | 760 (15,64%)  | 135 (39,47%) | 17 (10,90%)   | 314 (13,53%)  |
| Angioinvasion                            | No                        | 816 (33,62%)  | 41 (21,69%)  | 26 (30,95%)   | 434 (36,94%)  |
|                                          | Yes                       | 1611 (66,38%) | 148 (78,31%) | 58 (69,05%)   | 741 (63,06%)  |
| Perineural<br>invasion                   | No                        | 740 (50,96%)  | 44 (38,94%)  | 25 (46,30%)   | 375 (53,19%)  |
|                                          | Yes                       | 712 (49,04%)  | 69 (61,06%)  | 29 (53,70%)   | 330 (46,81%)  |
| Primary<br>tumour<br>localization        | Right colon               | 1570 (24,6%)  | 293 (69,43%) | 35 (17,77%)   | 784 (25,87%)  |
|                                          | Left colon                | 1849 (28,97%) | 58 (13,74%)  | 51 (25,89%)   | 825 (27,22%)  |
|                                          | Rectum                    | 2964 (46,44%) | 71 (16,82%)  | 111 (56,35%)  | 1422 (46,92%) |
| Primary<br>sidedness                     | Left colon or rec-<br>tum | 4827 (75,46%) | 129 (30,57%) | 163 (82,32%)  | 2255 (74,20%) |

|                                           |                    |               |              |              |               |
|-------------------------------------------|--------------------|---------------|--------------|--------------|---------------|
|                                           | Right colon        | 1570 (24,54%) | 293 (69,43%) | 35 (17,68%)  | 784 (25,80%)  |
| Primary localization<br>(colon vs rectum) | Colon              | 4149 (58,33%) | 398 (84,86%) | 107 (49,08%) | 1953 (57,87%) |
|                                           | Rectum             | 2964 (41,67%) | 71 (15,14%)  | 111 (50,92%) | 1422 (42,13%) |
| Sample type                               | Endoscopy          | 1388 (22,91%) | 73 (17,76%)  | 45 (22,84%)  | 654 (22,58%)  |
|                                           | Needle             | 218 (3,6%)    | 7 (1,70%)    | 12 (6,09%)   | 90 (3,11%)    |
|                                           | Surgery            | 4452 (73,49%) | 331 (80,54%) | 140 (71,07%) | 2152 (74,31%) |
| Sample source                             | Primary            | 4968 (87,88%) | 346 (90,58%) | 153 (83,61%) | 2376 (88,43%) |
|                                           | Metastatic         | 685 (12,12%)  | 36 (9,42%)   | 30 (16,39%)  | 311 (11,57%)  |
| Location of metastatic samples            | local recurrence   | 81 (11,82%)   | 3 (0,79%)    | 5 (2,73%)    | 39 (1,45%)    |
|                                           | liver              | 266 (38,83%)  | 11 (2,88%)   | 11 (6,01%)   | 108 (4,02%)   |
|                                           | lung               | 73 (10,66%)   | 3 (0,79%)    | 1 (0,55%)    | 42 (1,56%)    |
|                                           | peritoneal         | 148 (21,61%)  | 12 (3,14%)   | 5 (2,73%)    | 76 (2,83%)    |
|                                           | nodal              | 31 (4,53%)    | 3 (0,79%)    | 2 (1,09%)    | 10 (0,37%)    |
|                                           | ovarian            | 33 (4,82%)    | 2 (0,52%)    | 1 (0,55%)    | 10 (0,37%)    |
|                                           | small intestine    | 26 (3,8%)     | 2 (0,52%)    | 2 (1,09%)    | 12 (0,45%)    |
|                                           | CNS                | 5 (0,73%)     | 0 (0%)       | 2 (1,09%)    | 2 (0,07%)     |
|                                           | skin/subcutaneous  | 22 (3,21%)    | 0 (0%)       | 1 (0,55%)    | 12 (0,45%)    |
| Biopsy vs surgery for primary samples     | Biopsy             | 1374 (25,49%) | 72 (19,15%)  | 44 (26,19%)  | 648 (24,98%)  |
|                                           | Surgery            | 4016 (74,51%) | 304 (80,85%) | 124 (73,81%) | 1946 (75,02%) |
| Biopsy vs surgery for metastatic samples  | Biopsy             | 259 (23,27%)  | 8 (11,94%)   | 14 (30,43%)  | 110 (20,83%)  |
|                                           | Surgery            | 854 (76,73%)  | 59 (88,06%)  | 32 (69,57%)  | 418 (79,17%)  |
| Geographic region                         | Dolnośląskie       | 832 (10,98%)  | 63 (12,28%)  | 26 (10,97%)  | 386 (10,79%)  |
|                                           | Kujawsko-pomorskie | 40 (0,53%)    | 1 (0,19%)    | 3 (1,27%)    | 18 (0,50%)    |
|                                           | Lubelskie          | 18 (0,24%)    | 1 (0,19%)    | 0 (0,00%)    | 9 (0,25%)     |

|                     |               |              |             |              |
|---------------------|---------------|--------------|-------------|--------------|
| Lubuskie            | 300 (3,96%)   | 16 (3,12%)   | 13 (5,49%)  | 141 (3,94%)  |
| Łódzkie             | 1129 (14,91%) | 59 (11,50%)  | 39 (16,46%) | 542 (15,16%) |
| Małopolskie         | 843 (11,13%)  | 64 (12,48%)  | 36 (15,19%) | 400 (11,19%) |
| Mazowieckie         | 752 (9,93%)   | 45 (8,77%)   | 22 (9,28%)  | 358 (10,01%) |
| Opolskie            | 304 (4,01%)   | 20 (3,90%)   | 9 (3,80%)   | 152 (4,25%)  |
| Podkarpackie        | 481 (6,35%)   | 34 (6,63%)   | 11 (4,64%)  | 234 (6,54%)  |
| Podlaskie           | 6 (0,08%)     | 0 (0,00%)    | 0 (0,00%)   | 1 (0,03%)    |
| Pomorskie           | 406 (5,36%)   | 30 (5,85%)   | 10 (4,22%)  | 190 (5,31%)  |
| Śląskie             | 1379 (18,21%) | 105 (20,47%) | 40 (16,88%) | 652 (18,23%) |
| Warmińsko-mazurskie | 219 (2,89%)   | 14 (2,73%)   | 7 (2,95%)   | 102 (2,85%)  |
| Wielkopolskie       | 356 (4,7%)    | 28 (5,46%)   | 11 (4,64%)  | 164 (4,59%)  |
| Zachodniopomorskie  | 509 (6,72%)   | 33 (6,43%)   | 10 (4,22%)  | 227 (6,35%)  |

Right colon (proximal) included caecum, ascending colon, hepatic flexure and transverse colon. Left colon (distal) included splenic flexure, descending and sigmoid colon. MANEC – mixed adeno-neuroendocrine cancer.

2

3

4

5

Table S2. Expanded clinical and pathological factors that affected the rate of *BRAF* V600E mutation.

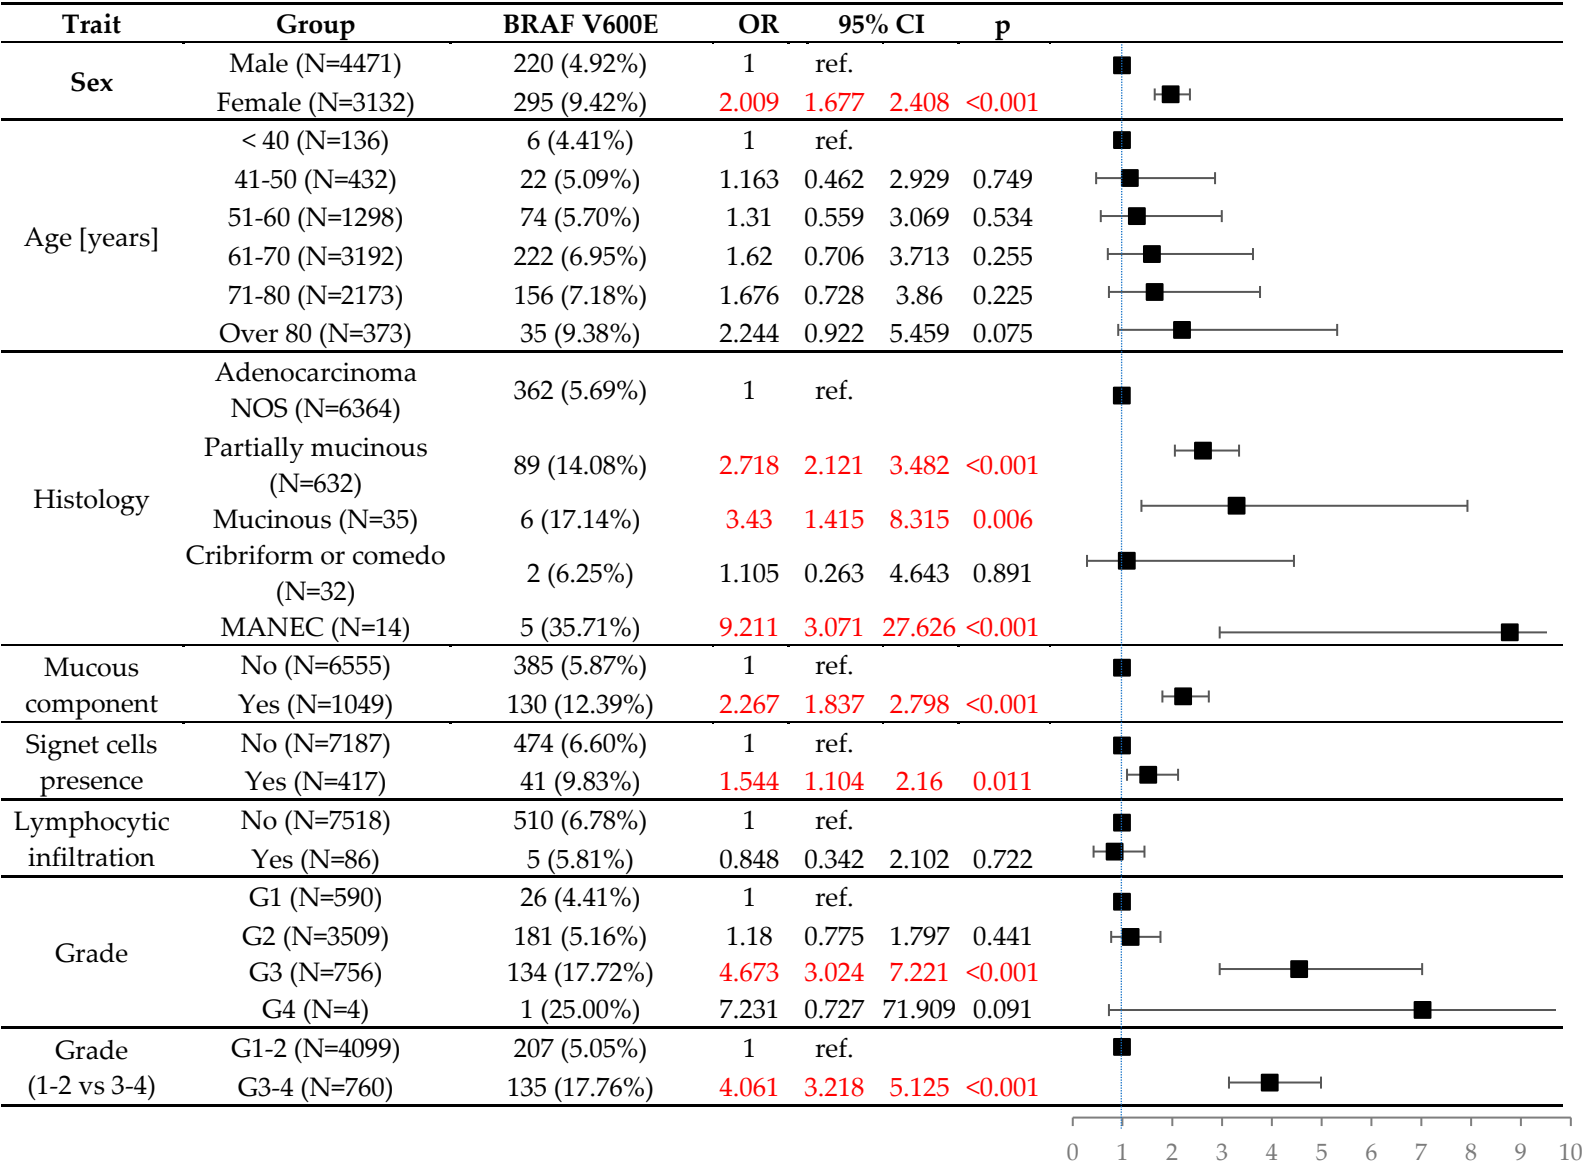

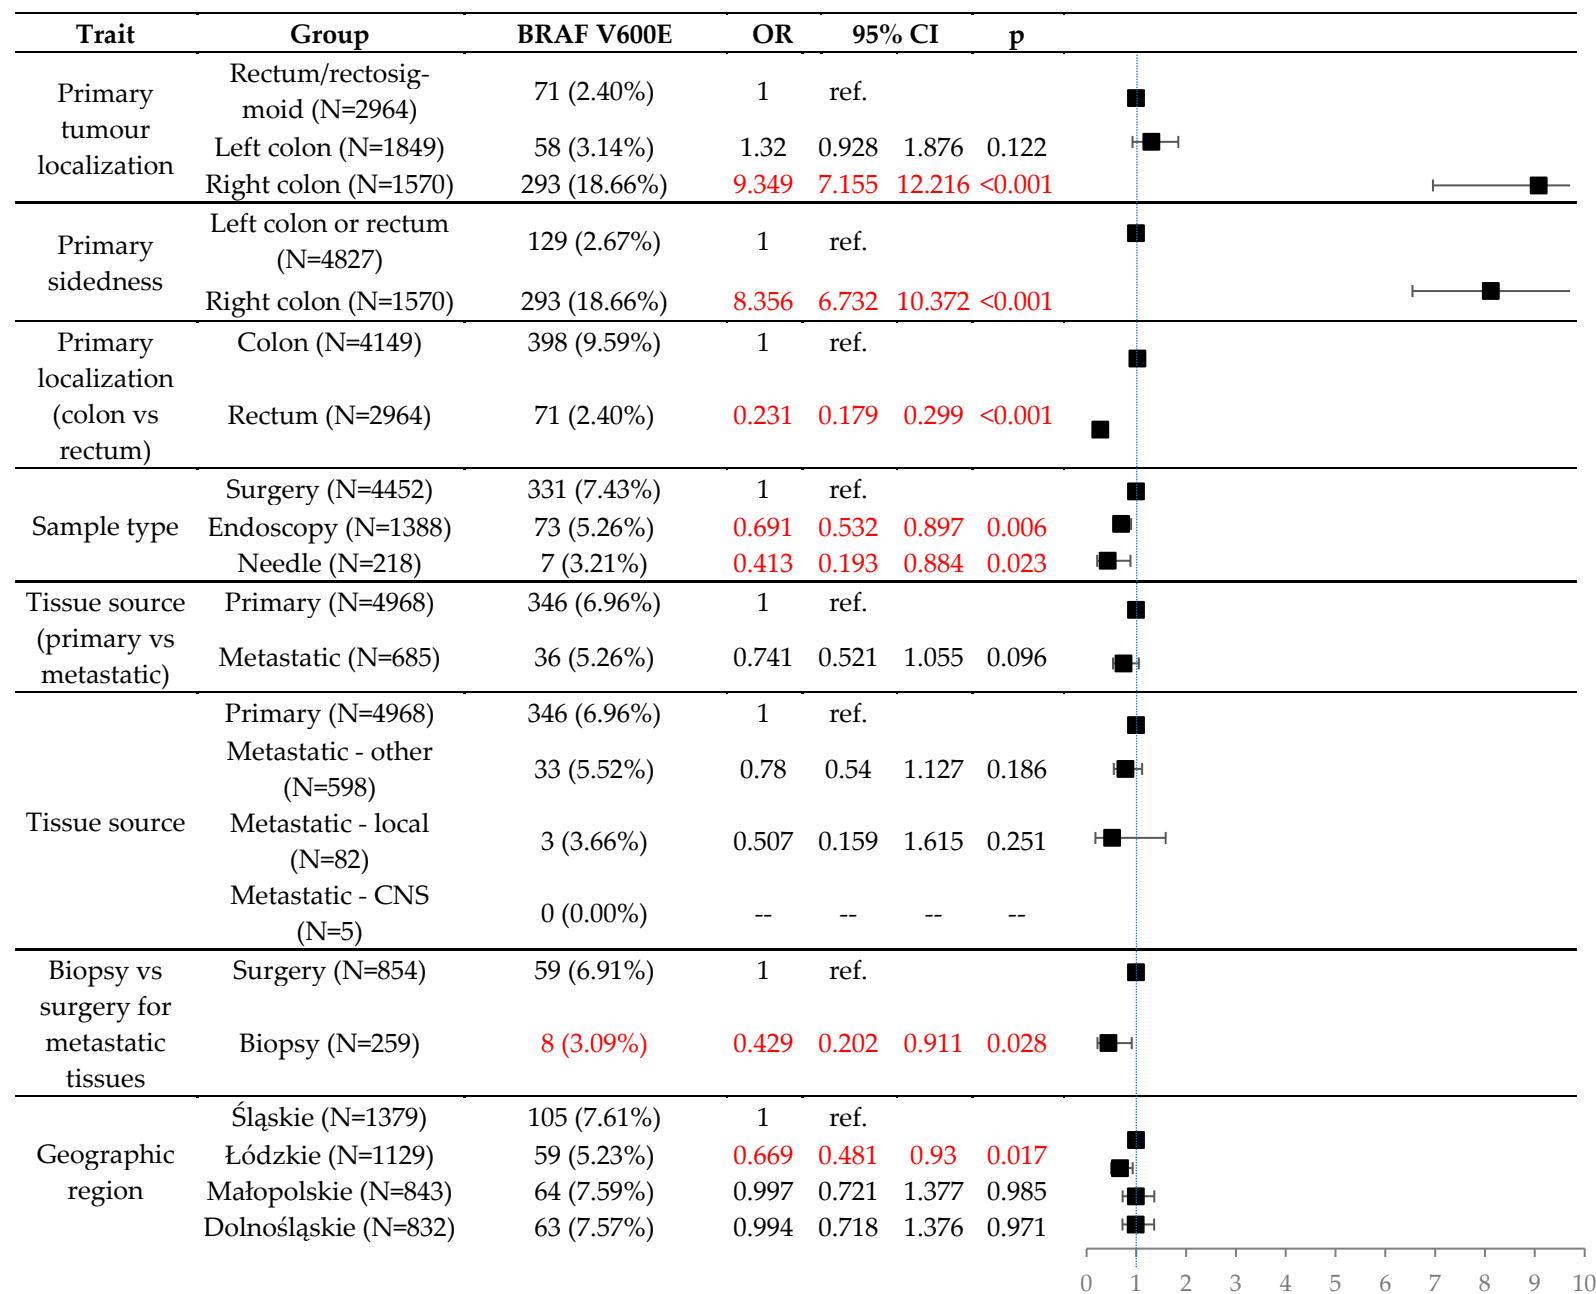

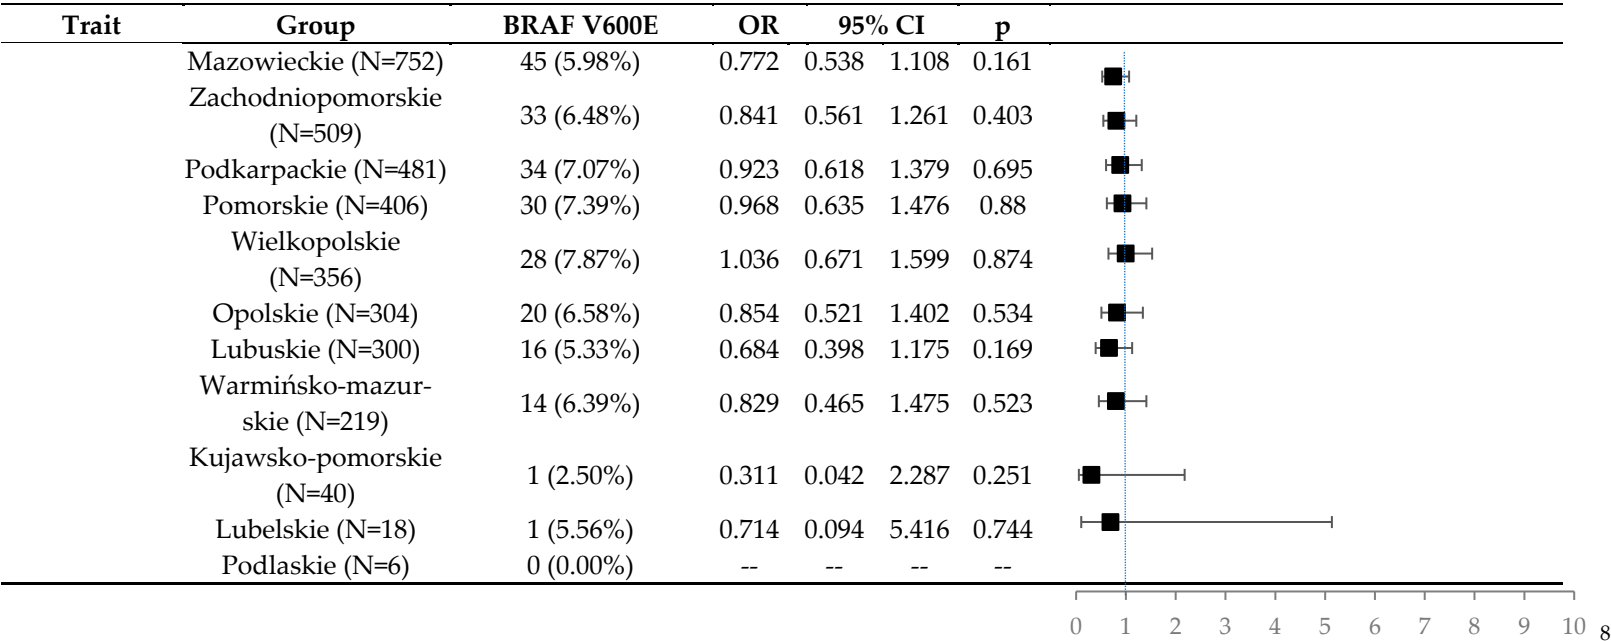

Right colon (proximal) included caecum, ascending colon, hepatic flexure and transverse colon. Left colon (distal) included splenic flexure, descending and sigmoid colon. Rectum included rectosigmoid tumours. MANEC – mixed adeno-neuroendocrine cancer. p - univariate logistic regressions.

9  
10  
11  
12

Table S3. Expanded clinical and pathological factors that affected the rate of *KRAS* G12C mutation.

13

| Trait                       | Group                       | KRAS G12C   | OR    | 95% CI |       | p     |   |
|-----------------------------|-----------------------------|-------------|-------|--------|-------|-------|---|
| Sex                         | Male (N=4471)               | 136 (3.04%) | 1     | ref.   |       |       | ■ |
|                             | Female (N=3132)             | 101 (3.22%) | 1.062 | 0.818  | 1.38  | 0.651 | ■ |
| Age [years]                 | < 40 (N=136)                | 6 (4.41%)   | 1     | ref.   |       |       | ■ |
|                             | 41-50 (N=432)               | 13 (3.01%)  | 0.672 | 0.251  | 1.804 | 0.43  | ■ |
|                             | 51-60 (N=1298)              | 36 (2.77%)  | 0.618 | 0.256  | 1.494 | 0.285 | ■ |
|                             | 61-70 (N=3192)              | 111 (3.48%) | 0.781 | 0.337  | 1.808 | 0.563 | ■ |
|                             | 71-80 (N=2173)              | 64 (2.95%)  | 0.657 | 0.28   | 1.547 | 0.337 | ■ |
|                             | Over 80 (N=373)             | 7 (1.88%)   | 0.414 | 0.137  | 1.256 | 0.119 | ■ |
| Histology                   | Partially mucinous (N=632)  | 23 (3.64%)  | 1     | ref.   |       |       | ■ |
|                             | Mucinous (N=35)             | 0 (0.00%)   | --    | --     | --    | --    |   |
|                             | Cribriform or comedo (N=32) | 2 (6.25%)   | 1.765 | 0.398  | 7.838 | 0.455 | ■ |
|                             | MANEC (N=14)                | 0 (0.00%)   | --    | --     | --    | --    |   |
|                             | Other (N=527)               | 16 (3.04%)  | 0.829 | 0.433  | 1.586 | 0.571 | ■ |
| Mucous component            | No (N=6555)                 | 200 (3.05%) | 1     | ref.   |       |       | ■ |
|                             | Yes (N=1049)                | 37 (3.53%)  | 1.162 | 0.813  | 1.66  | 0.41  | ■ |
| Signet cells presence       | No (N=7187)                 | 223 (3.10%) | 1     | ref.   |       |       | ■ |
|                             | Yes (N=417)                 | 14 (3.36%)  | 1.085 | 0.626  | 1.879 | 0.771 | ■ |
| Lymphocytic infiltration    | No (N=7518)                 | 237 (3.15%) | 1     | ref.   |       |       | ■ |
|                             | Yes (N=86)                  | 0 (0.00%)   | --    | --     | --    | --    |   |
| Grade                       | G1 (N=590)                  | 17 (2.88%)  | 1     | ref.   |       |       | ■ |
|                             | G2 (N=3509)                 | 122 (3.48%) | 1.214 | 0.725  | 2.032 | 0.46  | ■ |
|                             | G3 (N=756)                  | 17 (2.25%)  | 0.775 | 0.392  | 1.532 | 0.464 | ■ |
|                             | G4 (N=4)                    | 0 (0.00%)   | --    | --     | --    | --    |   |
| Grade (1-2 vs 3-4)          | G1-2 (N=4099)               | 139 (3.39%) | 1     | ref.   |       |       | ■ |
|                             | G3-4 (N=760)                | 17 (2.24%)  | 0.652 | 0.392  | 1.085 | 0.1   | ■ |
| Primary tumour localization | Rectum (N=2964)             | 111 (3.74%) | 1     | ref.   |       |       | ■ |
|                             | Left colon (N=1849)         | 51 (2.76%)  | 0.729 | 0.521  | 1.021 | 0.066 | ■ |
|                             | Right colon (N=1570)        | 35 (2.23%)  | 0.586 | 0.399  | 0.861 | 0.007 | ■ |

0 1 2 3 4 5 6 7 8 9 10



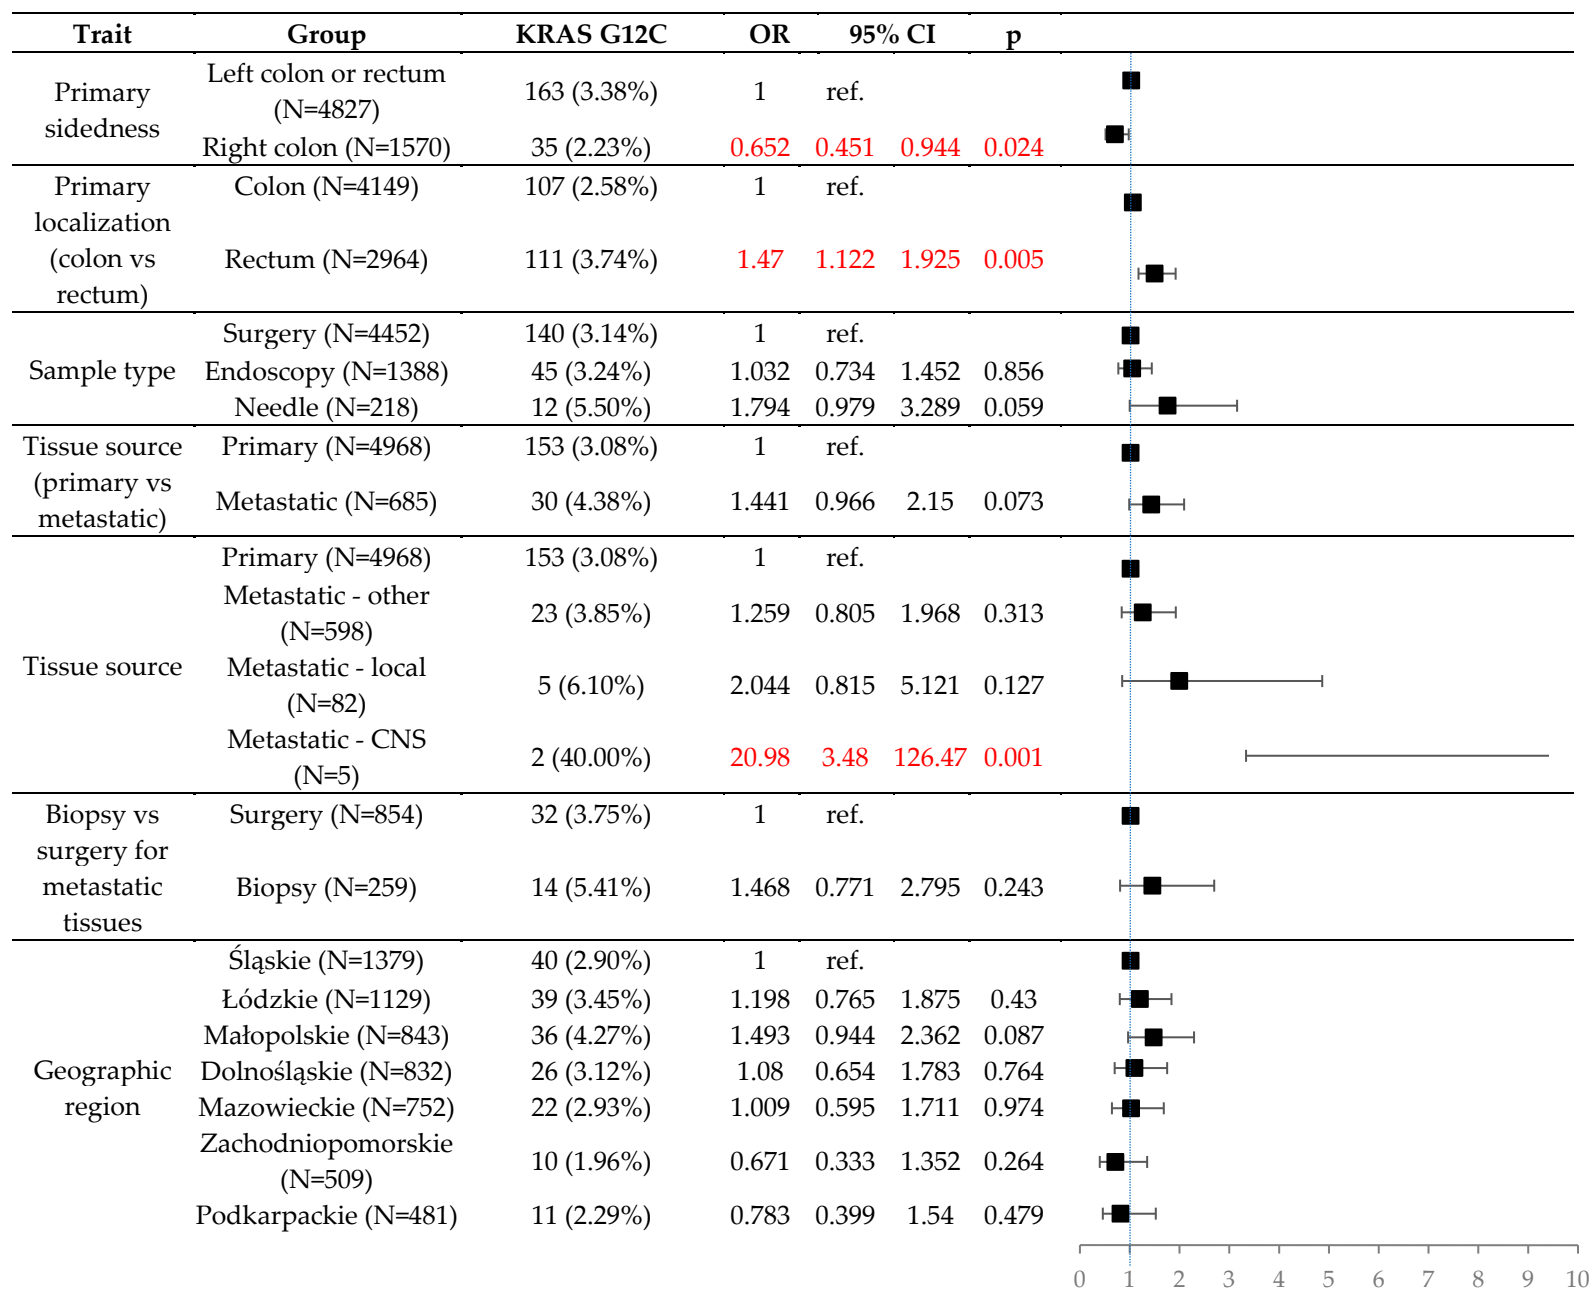

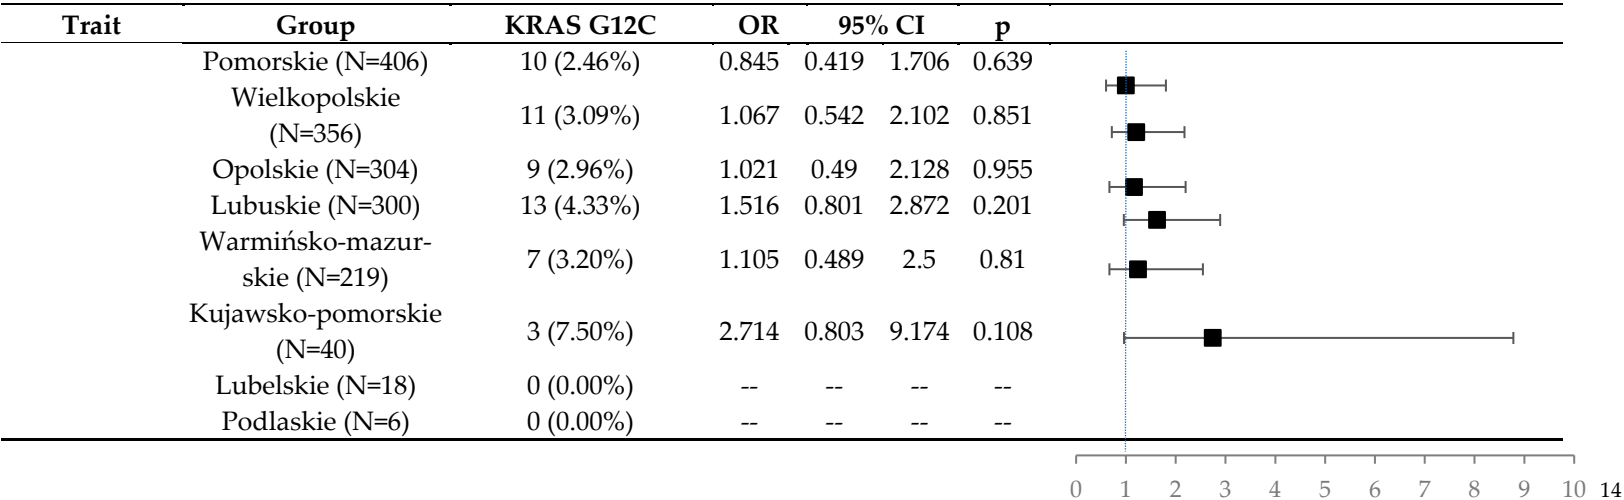

Right colon (proximal) included caecum, ascending colon, hepatic flexure and transverse colon. Left colon (distal) included splenic flexure, descending and sigmoid colon. Rectum included rectosigmoid tumours. MANEC – mixed adeno-neuroendocrine cancer. 15  
p - univariate logistic regressions. 16  
17  
18

Table S4. Expanded clinical and pathological factors that affected the rate of *KRAS* G12C mutation among other *KRAS* mutations.

19

| Trait                       | Group                       | KRAS G12C   | OR    | 95% CI |        | p     |   |
|-----------------------------|-----------------------------|-------------|-------|--------|--------|-------|---|
| Sex                         | Male (N=2200)               | 136 (6.18%) | 1     | ref.   |        |       | ■ |
|                             | Female (N=1628)             | 101 (6.20%) | 1.004 | 0.77   | 1.309  | 0.978 | ■ |
| Age [years]                 | < 40 (N=65)                 | 6 (9.23%)   | 1     | ref.   |        |       | ■ |
|                             | 41-50 (N=203)               | 13 (6.40%)  | 0.673 | 0.245  | 1.848  | 0.442 | ■ |
|                             | 51-60 (N=624)               | 36 (5.77%)  | 0.602 | 0.244  | 1.488  | 0.272 | ■ |
|                             | 61-70 (N=1597)              | 111 (6.95%) | 0.735 | 0.31   | 1.739  | 0.483 | ■ |
|                             | 71-80 (N=1134)              | 64 (5.64%)  | 0.588 | 0.245  | 1.414  | 0.236 | ■ |
|                             | Over 80 (N=205)             | 7 (3.41%)   | 0.348 | 0.113  | 1.074  | 0.066 | ■ |
| Histology                   | Partially mucinous (N=405)  | 23 (5.68%)  | 1     | ref.   |        |       | ■ |
|                             | Mucinous (N=10)             | 0 (0.00%)   | --    | --     | --     | --    |   |
|                             | Cribriform or comedo (N=11) | 2 (18.18%)  | 3.691 | 0.753  | 18.079 | 0.107 | ■ |
|                             | MANEC (N=2)                 | 0 (0.00%)   | --    | --     | --     | --    |   |
|                             | Other (N=292)               | 16 (5.48%)  | 0.963 | 0.499  | 1.856  | 0.91  | ■ |
| Mucous component            | No (N=3175)                 | 200 (6.30%) | 1     | ref.   |        |       | ■ |
|                             | Yes (N=653)                 | 37 (5.67%)  | 0.893 | 0.623  | 1.282  | 0.541 | ■ |
| Signet cells presence       | No (N=3580)                 | 223 (6.23%) | 1     | ref.   |        |       | ■ |
|                             | Yes (N=248)                 | 14 (5.65%)  | 0.901 | 0.517  | 1.571  | 0.712 | ■ |
| Lymphocytic infiltration    | No (N=3786)                 | 237 (6.26%) | 1     | ref.   |        |       | ■ |
|                             | Yes (N=42)                  | 0 (0.00%)   | --    | --     | --     | --    |   |
| Grade                       | G1 (N=316)                  | 17 (5.38%)  | 1     | ref.   |        |       | ■ |
|                             | G2 (N=1830)                 | 122 (6.67%) | 1.256 | 0.745  | 2.118  | 0.392 | ■ |
|                             | G3 (N=330)                  | 17 (5.15%)  | 0.955 | 0.479  | 1.906  | 0.897 | ■ |
|                             | G4 (N=1)                    | 0 (0.00%)   | --    | --     | --     | --    |   |
| Grade (1-2 vs 3-4)          | G1-2 (N=2146)               | 139 (6.48%) | 1     | ref.   |        |       | ■ |
|                             | G3-4 (N=331)                | 17 (5.14%)  | 0.782 | 0.466  | 1.312  | 0.351 | ■ |
| Primary tumour localization | Rectum (N=1533)             | 111 (7.24%) | 1     | ref.   |        |       | ■ |
|                             | Left colon (N=876)          | 51 (5.82%)  | 0.792 | 0.562  | 1.115  | 0.182 | ■ |
|                             | Right colon (N=819)         | 35 (4.27%)  | 0.572 | 0.387  | 0.845  | 0.005 | ■ |

0 1 2 3 4 5 6 7 8 9 10

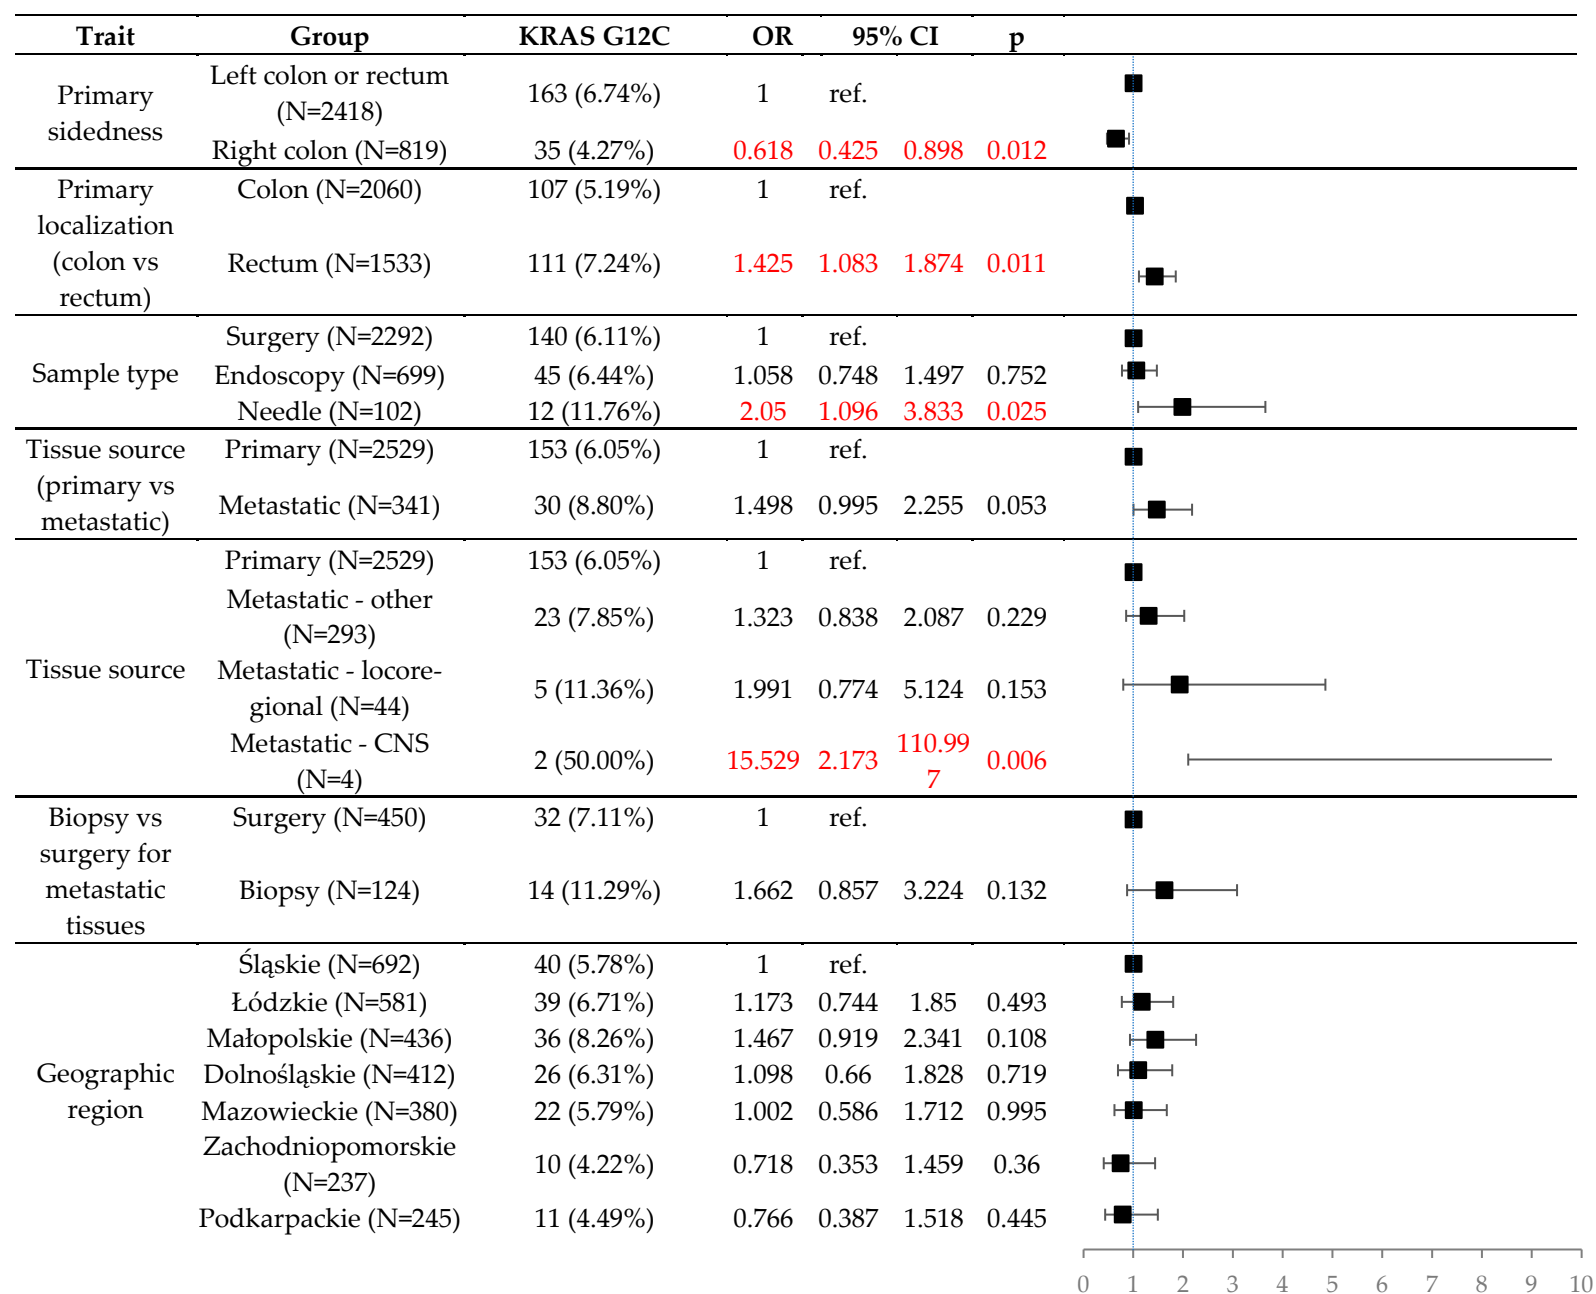

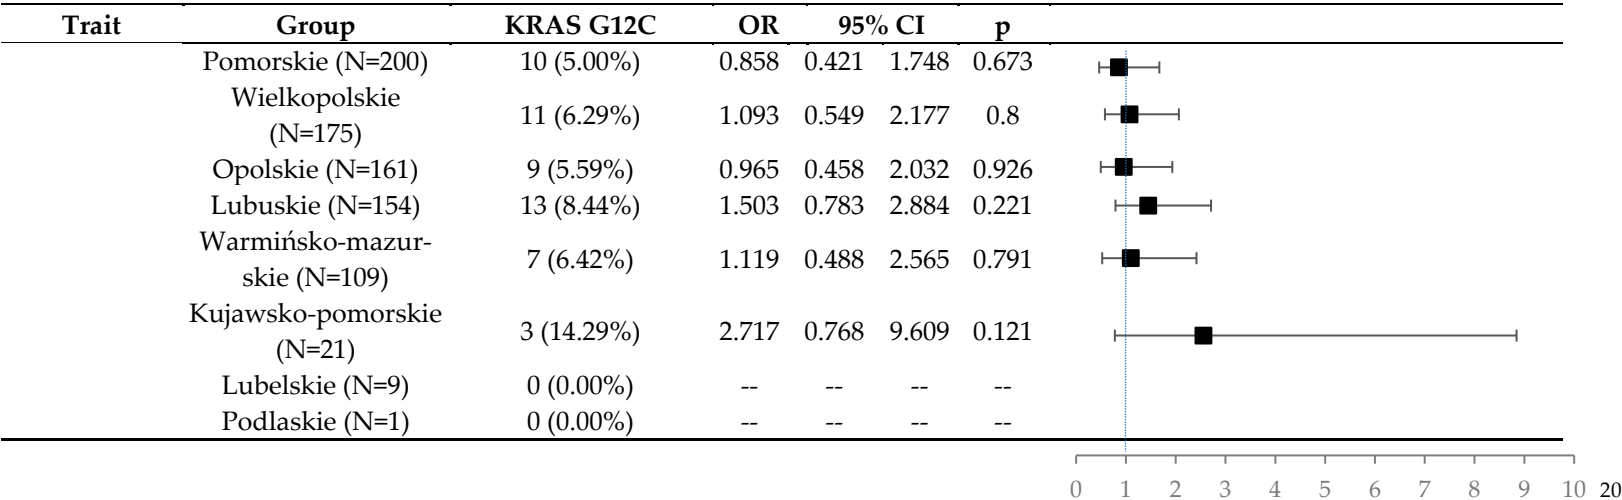

Right colon (proximal) included caecum, ascending colon, hepatic flexure and transverse colon. Left colon (distal) included splenic flexure, descending and sigmoid colon. Rectum included rectosigmoid tumours. MANEC – mixed adeno-neuroendocrine cancer. 21  
p - univariate logistic regressions. 22  
23

24

25
